# Supplementary material for: Downregulation of blood serum microRNA 29 family in patients with Parkinson’s disease
Source: PubMed Central journal article supplement (PMC5511199; doi:10.1038/s41598-017-03887-3), 2017-07-14
Supplement: 41598_2017_3887_MOESM1_ESM.pdf [file 41598_2017_3887_MOESM1_ESM.pdf]

---

**SUPPLEMENTAL INFORMATION**

**Downregulation of blood serum microRNA 29 family in patients with  
Parkinson's disease**

Xiaochen Bai, Yilin Tang, Mei Yu, Lei Wu, Fengtao Liu, Jianliang Ni, Zishan Wang, Jinghui Wang,  
Jian Fei, Wei Wang, Fang Huang, Jian Wang

## SUPPLEMENTAL TABLES

**TABLE S1** Correlation analysis of between serum miR-29s expression and other predictors (disease duration, UPDRS score or age).

|                | Duration |       | UPDRS    |       | Age      |       |
|----------------|----------|-------|----------|-------|----------|-------|
|                | r        | p     | r        | p     | r        | p     |
| <b>miR-29a</b> | -0.123   | 0.283 | -0.123   | 0.292 | 1.708(F) | 0.054 |
| <b>miR-29b</b> | -0.14    | 0.223 | -0.022   | 0.852 | -0.067   | 0.564 |
| <b>miR-29c</b> | -0.17    | 0.145 | 0.471(F) | 0.984 | -0.220   | 0.058 |

## SUPPLEMENTAL FIGURES

**A**

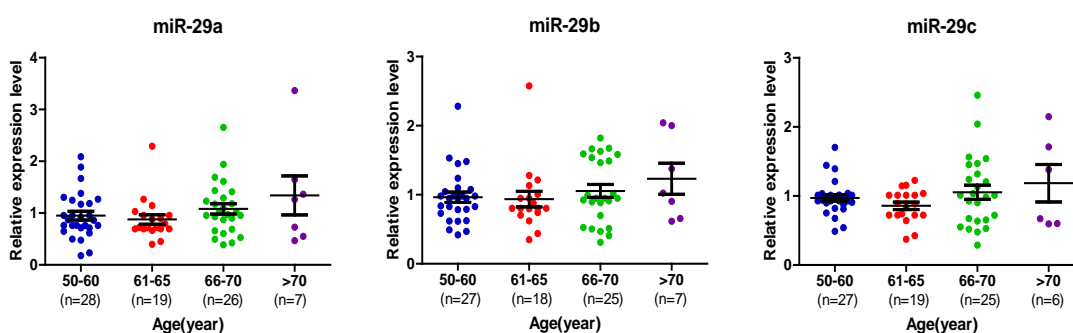

**B**

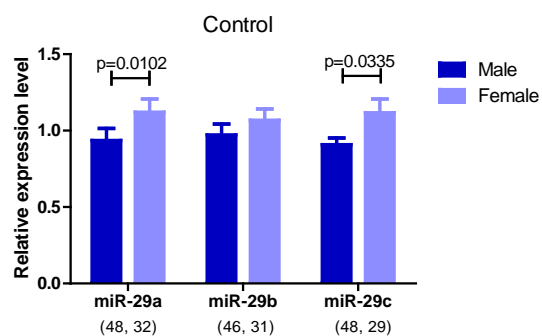

**FIGURE S1.** The serum miR-29s levels in the control subjects. **(A)** Serum miR-29s levels did not alter with the age; **(B)** Serum levels of miR-29a and miR-29c were markedly higher in females when compared to those in males.
